# Supplementary material for: Characteristics of the cerebrospinal fluid pressure waveform and craniospinal compliance in idiopathic intracranial hypertension subjects
Source: PubMed Central journal article supplement (PMC6069551; doi:10.1186/s12987-018-0106-5), 2018-08-01

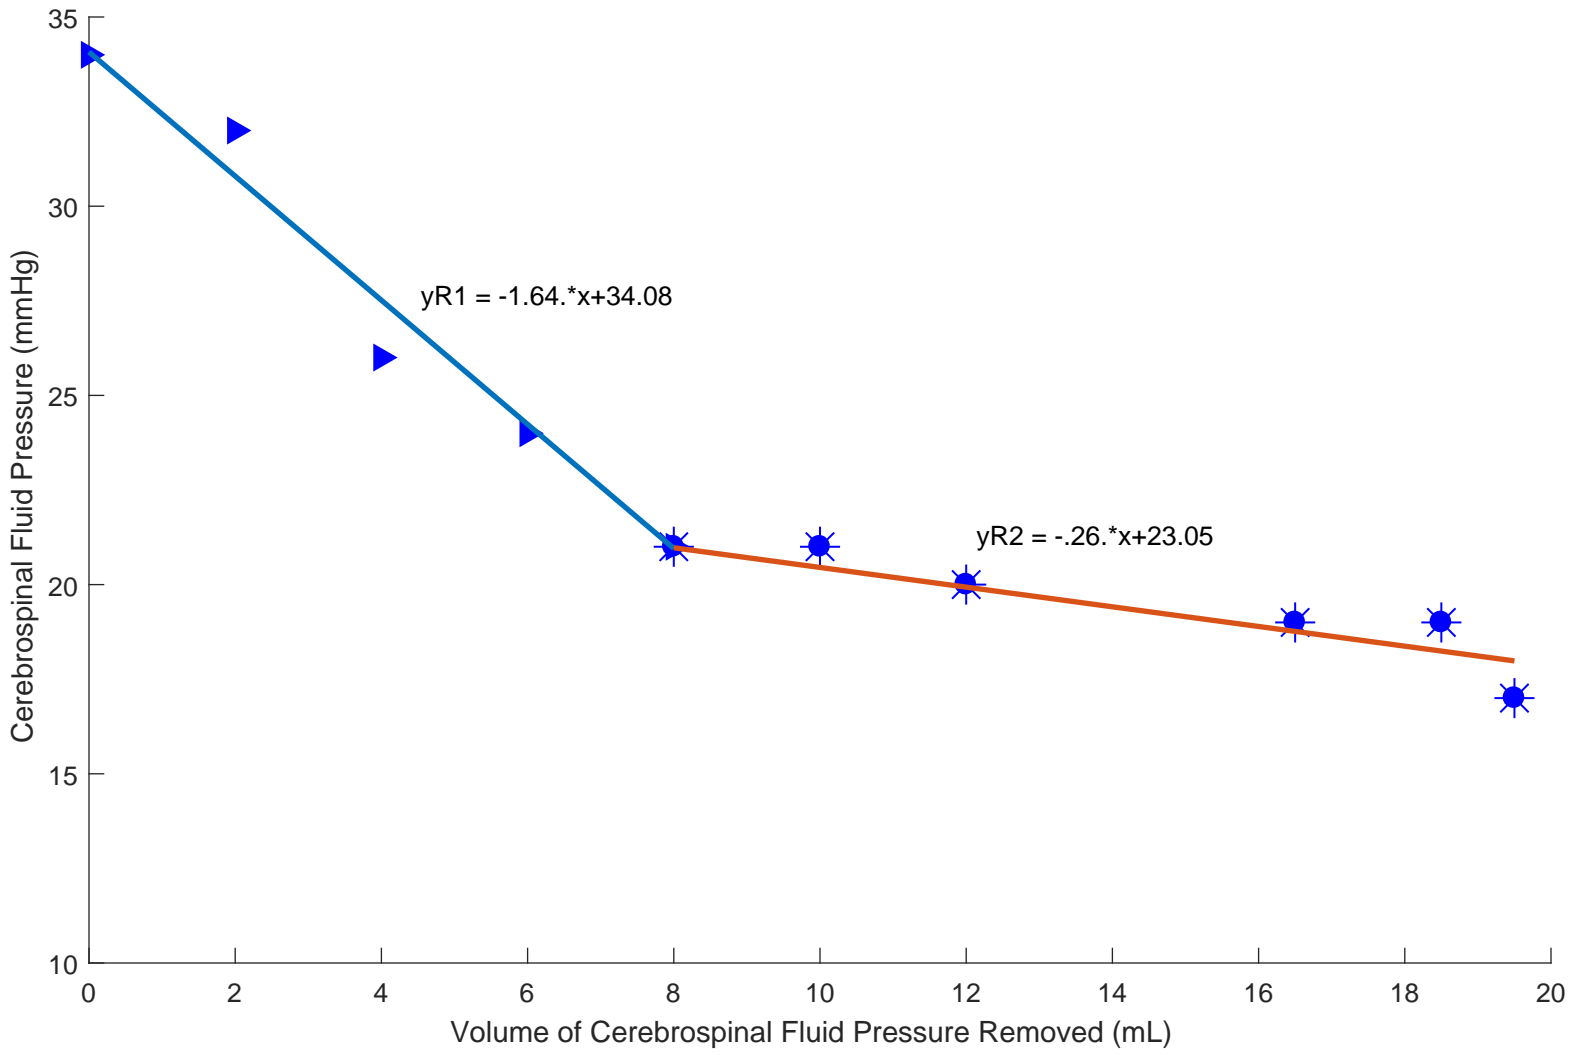

Supplement: 12987_2018_106_MOESM1_ESM.pdf [file 12987_2018_106_MOESM1_ESM.pdf]
