# Supplementary material for: Characteristics of the cerebrospinal fluid pressure waveform and craniospinal compliance in idiopathic intracranial hypertension subjects
Source: PubMed Central journal article supplement (PMC6069551; doi:10.1186/s12987-018-0106-5), 2018-08-01
Supplement: 12987_2018_106_MOESM3_ESM.pdf [file 12987_2018_106_MOESM3_ESM.pdf]

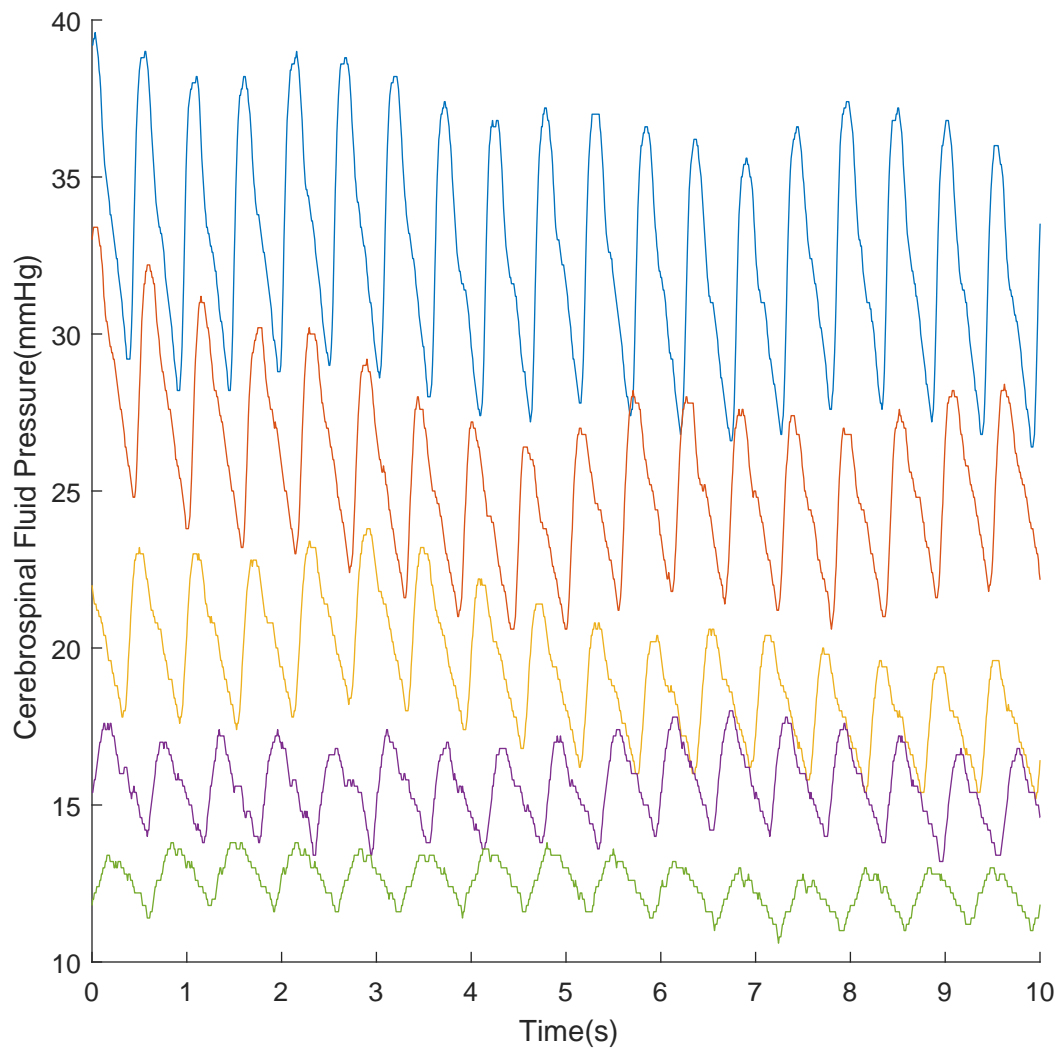

**The Mean CSF Pressures as CSF Fluid is Drained**

- 33 mmHg
- 25 mmHg
- 19 mmHg
- 16 mmHg
- 12 mmHg
